# Supplementary material for: Systematic review of the concept ‘male involvement in maternal health’ by natural language processing and descriptive analysis
Source: PubMed Central journal article supplement — BMJ Glob Health. 2021 Apr 12;6(4):e004909. doi: 10.1136/bmjgh-2020-004909 (PMC8048011; doi:10.1136/bmjgh-2020-004909), 2021-04-12
Supplement: bmjgh-2020-004909supp002.pdf [file bmjgh-2020-004909supp002.pdf]

Additional File 2: Prisma Flow chart<sup>1</sup>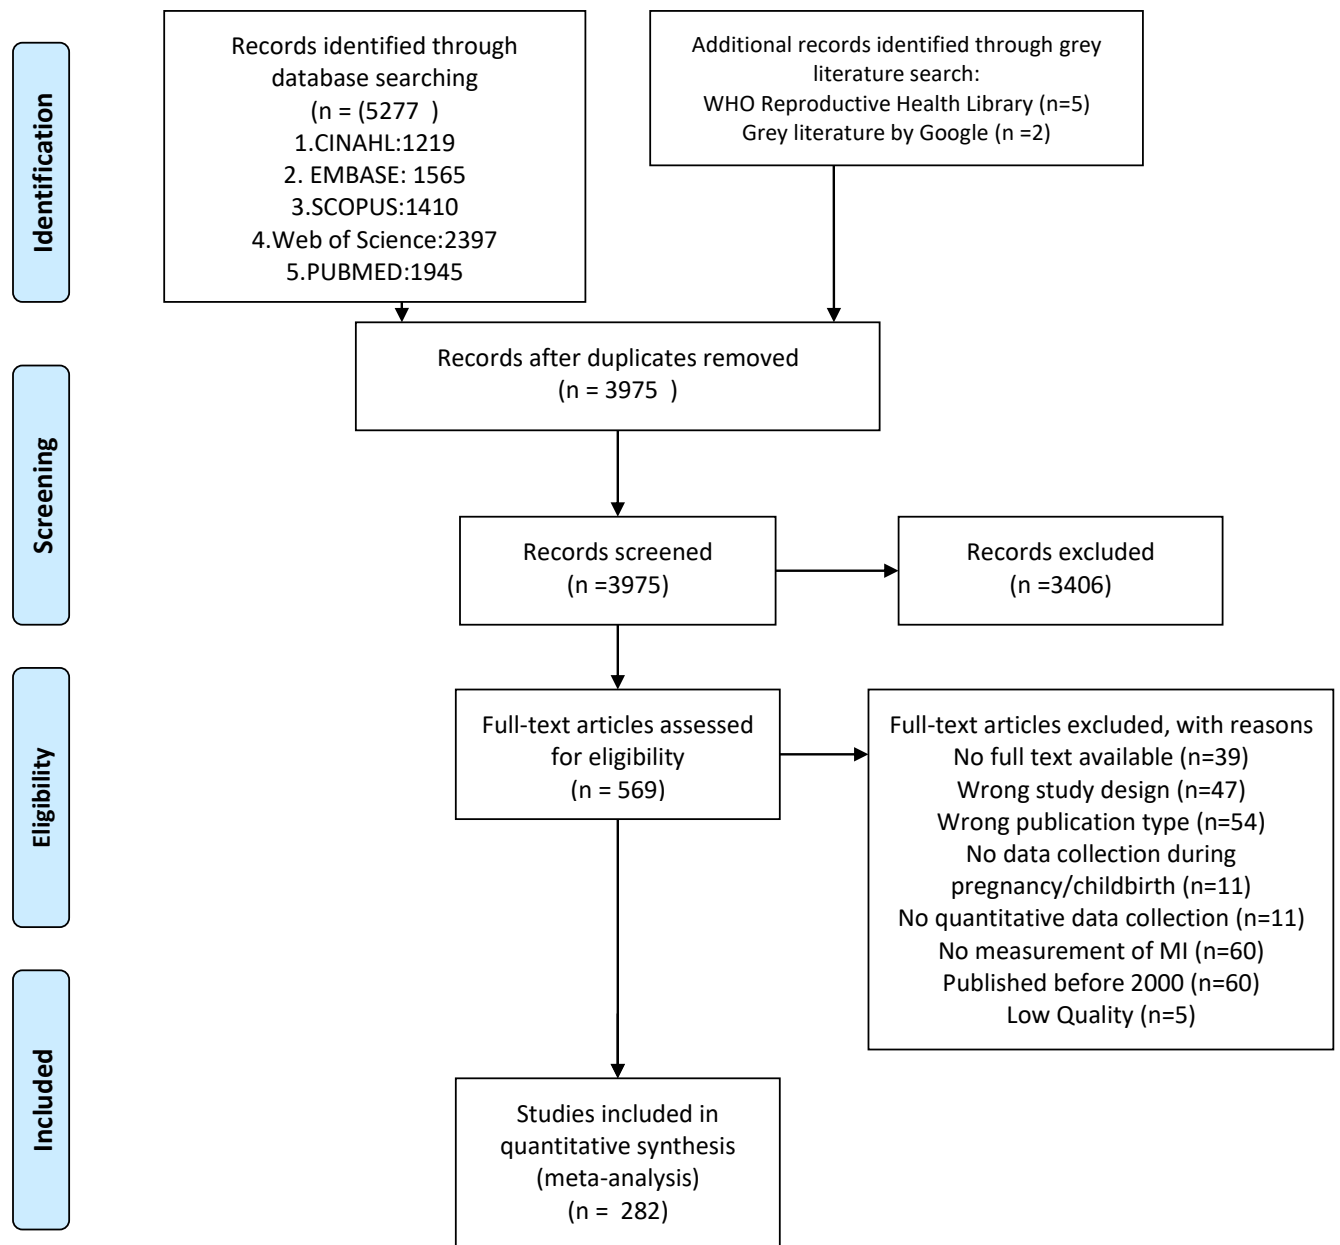

<sup>1</sup>From: Moher D, Liberati A, Tetzlaff J, Altman DG, The PRISMA Group (2009). Preferred Reporting Items for Systematic Reviews and Meta-Analyses: The PRISMA Statement. *PLoS Med* 6(7): e1000097. doi:10.1371/journal.pmed1000097

For more information, visit [www.prisma-statement.org](http://www.prisma-statement.org).
