# Supplementary material for: Systematic review of the concept ‘male involvement in maternal health’ by natural language processing and descriptive analysis
Source: PubMed Central journal article supplement — BMJ Glob Health. 2021 Apr 12;6(4):e004909. doi: 10.1136/bmjgh-2020-004909 (PMC8048011; doi:10.1136/bmjgh-2020-004909), 2021-04-12
Supplement: bmjgh-2020-004909supp003.pdf [file bmjgh-2020-004909supp003.pdf]

**Additional File 3: Results Fisher exact test**

|               | Involvement    |                             |    |                   |             |                                            |
|---------------|----------------|-----------------------------|----|-------------------|-------------|--------------------------------------------|
|               | ANC attendance | Financial support transport | or | Presence delivery | HIV testing | Psychosocial scale measurement (>10 items) |
| Participation | 0.60           | 0.12                        |    | 0.77              | 0.54        | 0.37                                       |
| Engagement    | 0.41           | 0.16                        |    | 0.62              | 0.61        | 0.16                                       |
| Attendance    | 0.08           | 0.34                        |    | 1                 | 1           | 1                                          |
| Presence      | 0.004          | 0.34                        |    | 0.004             | 0.35        | 0.16                                       |
| Support       | <0.001         | 0.013                       |    | <0.001            | <0.001      | <0.001                                     |

*Table 1 Results of the Fisher exact tests for assessing a difference in the use of indicators between studies using the term involvement, participation, engagement, attendance, presence and support.*
