# Supplementary material for: Systematic review of the concept ‘male involvement in maternal health’ by natural language processing and descriptive analysis
Source: PubMed Central journal article supplement — BMJ Glob Health. 2021 Apr 12;6(4):e004909. doi: 10.1136/bmjgh-2020-004909 (PMC8048011; doi:10.1136/bmjgh-2020-004909), 2021-04-12
Supplement: bmjgh-2020-004909supp004.pdf [file bmjgh-2020-004909supp004.pdf]

**Additional File 4: Reference list of studies with a multidimensional assessment of male involvement***Table 1 Overview of the studies using a multidimensional assessment (at least three indicators) of male involvement, based on data from men and women directly*

| ID  | title                                                                                                                                                                                                 | First author name | year | country      | design                             | topic    |
|-----|-------------------------------------------------------------------------------------------------------------------------------------------------------------------------------------------------------|-------------------|------|--------------|------------------------------------|----------|
| 6   | Abortion risk and decisionmaking among young people in urban Cameroon.                                                                                                                                | Calves A.         | 2002 | Cameroon     | cross sectional studies            | Abortion |
| 22  | Assessing Determinants of Father's Involvement with His partner's Pregnancy and His Child's Well-being: The Father Resources Survey Instrument                                                        | Cubbins C.        | 2018 | US           | Scale or Questionnaire development | PSH      |
| 25  | Assessment of the level of male involvement in safe motherhood in southern Nigeria                                                                                                                    | Nwakwuo C. G.     | 2013 | Nigeria      | cross sectional studies            | MNH      |
| 40  | Child gender and father involvement in fragile families                                                                                                                                               | Lundberg S.       | 2007 | US           | Cohort Studies                     | PSH      |
| 82  | Explaining the Long Reach of Fathers' Prenatal Involvement on Later Paternal Engagement                                                                                                               | Cabrera N.J.      | 2008 | US           | Cohort studies                     | PSH      |
| 89  | Factors associated with male partner involvement in programs for the prevention of mother-to-child transmission of HIV in rural South Africa                                                          | Matseke M. G.     | 2017 | South Africa | cross sectional studies            | PMTCT    |
| 97  | Father Early Engagement Behaviors and Infant Low Birth Weight                                                                                                                                         | Lee S.J.          | 2018 | US           | Cohort studies                     | MNH      |
| 100 | Father involvement, child health and maternal health behavior                                                                                                                                         | Teitler J. O.     | 2001 | US           | cross sectional studies            | MNH      |
| 101 | Fathers' emotional involvement with the neonate Impact of the umbilical cord cutting experience                                                                                                       | Brandão S.        | 2012 | Portugal     | Quasi experimental                 | PSH      |
| 116 | Impact of male partner involvement on mother-to-child transmission of HIV and HIV-free survival among HIV-exposed infants in rural South Africa: Results from a two phase randomised controlled trial | Sifunda S.        | 2019 | South-Africa | experimental                       | PMTCT    |
| 119 | Improving PMTCT Uptake in Rural South Africa                                                                                                                                                          | Weiss S. M;       | 2014 | South Africa | experimental                       | PMTCT    |
| 135 | Knowledge, Perception and Level of Male Partner Involvement in Choice of Delivery Site among Couples at Coast Level Five Hospital, Mombasa County, Kenya                                              | Onchong'a J.M.    | 2016 | Kenya        | cross sectional studies            | MNH      |
| 137 | Level of males' participation during perinatal period in rural areas of district layyah                                                                                                               | Ishtiaq M.        | 2016 | Pakistan     | cross sectional studies            | MNH      |

|     |                                                                                                                                                                                                        |                     |      |            |                         |     |
|-----|--------------------------------------------------------------------------------------------------------------------------------------------------------------------------------------------------------|---------------------|------|------------|-------------------------|-----|
| 139 | Male and female involvement in the birth and child-rearing process                                                                                                                                     | Maroto-Navarro G.   | 2013 | Spain      | cross sectional studies | MNH |
| 146 | Male involvement in maternal healthcare as a determinant of utilisation of skilled birth attendants in kenya                                                                                           | Mangeni J. N.       | 2012 | Kenya      | cross sectional studies | MNH |
| 166 | Measuring parents' experiences and satisfaction with care during very preterm birth: a questionnaire development study                                                                                 | Sawyer A.           | 2014 | UK         | Scale                   | PSH |
| 168 | Men in maternal care evidence from India                                                                                                                                                               | Chattopadhyay R.    | 2012 | India      | cross sectional studies | MNH |
| 208 | Possible selves and prenatal father involvement                                                                                                                                                        | Adamsons K.         | 2013 | US         | cross sectional studies | MNH |
| 247 | Stress and anxiety in relation to amniocentesis do women who perceive their partners to be more involved in pregnancy feel less stressed and anxious                                                   | Brajenović-Milić B. | 2010 | Croatia    | cross sectional studies | PSH |
| 248 | Suami SIAGA: male engagement in maternal health in Indonesia.                                                                                                                                          | Kurniati A.         | 2017 | Indonesia  | cross sectional studies | MNH |
| 260 | The Effects of Father Involvement during Pregnancy on Receipt of Prenatal Care and Maternal Smoking                                                                                                    | Martin L. T.        | 2007 | US         | Cohort Studies          | MNH |
| 277 | What do women want? An analysis of preferences of women, involvement of men, and decision-making in maternal and newborn health care in rural Bangladesh                                               | Rahman A. E.        | 2020 | Bangladesh | cross sectional studies | MNH |
| 105 | Gender-transformative Bandebereho couples' intervention to promote male engagement in reproductive and maternal health and violence prevention in Rwanda: Findings from a randomized controlled trial. | Doyle K.            | 2018 | Rwanda     | Quasi experimental      | MNH |
| 101 | Fathers' emotional involvement with the neonate Impact of the umbilical cord cutting experience                                                                                                        | Brandão S.          | 2012 | Portugal   | cross sectional studies | MNH |
| 134 | Knowledge and involvement of husbands in maternal and newborn health in rural Bangladesh                                                                                                               | Rahman A. E.        | 2018 | Bangladesh | cross sectional studies | MNH |
| 169 | Men's Involvement in Safe Motherhood                                                                                                                                                                   | Okechukwu E.        | 2007 | Nigeria    | cross sectional studies | MNH |
